# Supplementary material for: Chemosensitization of Solid Tumors by Inhibition of Bcl-xL Expression Using DNAzyme
Source: PubMed Central journal article supplement (PMC4253417; doi:10.18632/oncotarget.1996), 2014-05-20
Supplement: oncotarget-05-9039-s001.pdf [file oncotarget-05-9039-s001.pdf]

## Chemosensitization of Solid Tumors by Inhibition of Bcl-xL Expression Using DNAzyme

### Supplementary Material

**Sup Table 1: Design, thermodynamics and *in vitro* activity of bcl-xL DNAzymes.**

| DNAzyme Codes | DNAzyme Sequences                  | $-G^{\circ}$ (kcal/mol) | <i>In vitro</i> Activity* |
|---------------|------------------------------------|-------------------------|---------------------------|
| DT861         | aagagttcaggctagctacaacgatcactacct  | 21.70                   | +                         |
| DT862         | tttaccgccaggctagctacaacgacccggaaga | 27.70                   | +                         |
| DT863         | cccagtttaggctagctacaacgacccatcccg  | 30.10                   | +                         |
| DT864         | acaatgcgaggctagctacaacgaccagtta    | 23.60                   | -                         |
| DT865         | aggccacaaggctagctacaacgagcgacccca  | 30.40                   | -                         |
| DT866         | aaaaggccaggctagctacaacgaaatgcgacc  | 22.70                   | -                         |
| DT867         | ttccacgcaggctagctacaacgaagtgccccg  | 30.90                   | -                         |
| DT868         | cgctttccaggctagctacaacgagcacagtgc  | 27.60                   | +                         |
| DT869         | cctgtctaggctagctacaacgagctttccac   | 25.80                   | ++                        |
| DT870         | atactgcaggctagctacaacgactcctgtc    | 25.60                   | +++                       |
| DT871         | tcaccaataggctagctacaacgactgcatctc  | 22.50                   | ++                        |
| DT872         | actaccaaggctagctacaacgaacctgcatc   | 24.80                   | -                         |
| DT873         | tccgactcaggctagctacaacgacaatacctg  | 23.20                   | -                         |
| DT874         | gcgatccgaggctagctacaacgatcaccaata  | 24.40                   | +                         |
| DT875         | aagctgcgaggctagctacaacgaccgactcac  | 25.40                   | +                         |
| DT876         | aagtggccaggctagctacaacgaccaagctgc  | 27.10                   | ++                        |
| DT877         | aggtggtcaggctagctacaacgatcaggtaag  | 22.80                   | ++                        |
| DT879         | tctcctggaggctagctacaacgaccaaggctc  | 27.10                   | +++                       |
| DT880         | acaaaagtaggctagctacaacgaccagccgc   | 25.20                   | -                         |
| DT881         | gtctggtcaggctagctacaacgattccgactg  | 25.40                   | ++                        |
| DT882         | ttttataaggctagctacaacgaagggatggg   | 18.90                   | ++                        |
| DT883         | acatttttaggctagctacaacgaaatagggat  | 17.40                   | +                         |
| DT884         | tctgagacaggctagctacaacgattttataat  | 16.80                   | +                         |
| DT885         | gctctgagaggctagctacaacgaattttata   | 19.40                   | +++                       |
| DT886         | agtcaaccaggctagctacaacgacagctcccg  | 27.50                   | ++                        |
| DT887         | gtggctccaggctagctacaacgatcaccgegg  | 30.50                   | -                         |

\**In vitro* cleavage activity was assessed according to the band intensity at the lowest concentration (5nM). The DNAzymes with the activity > ++ were selected as efficient cleavers.
